# Supplementary material
Source: PubMed Central journal article supplement (PMC3062473)

Supporting information for...

A Highly Potent and Selective Caspase 1 Inhibitor that Utilizes a Key 3-Cyanopropanoic Acid Moiety.

Matthew B. Boxer, Amy M. Quinn, Min Shen, Ajit Jadhav, William Leister, Anton Simeonov, Douglas S. Auld and Craig J. Thomas\*

*NIH Chemical Genomics Center, National Human Genome Research Institute, National Institutes of Health, 9800 Medical Center Drive, Rockville, Maryland 20850, USA.*

Send proofs to: Dr. Craig J. Thomas  
NIH Chemical Genomics Center  
NHGRI, National Institutes of Health  
9800 Medical Center Drive  
Building B, Room 3005  
MSC: 3370  
Bethesda, MD 20892-3370  
301-217-4079  
301-217-5736 (fax)  
craigt@mail.nih.gov

### NCGC00183434 Ki Determination

Active caspase-1 was purchased from Enzo Life Sciences (Plymouth Meeting, PA) as recombinant enzyme expressed in *E.coli* from a construct encoding residues 120-404, with a D381E substitution to resist autoproteolysis. The inhibitor constant,  $K_I$ , was determined for NCGC00183434 (**4**) in reactions of 2 nM caspase-1 with varied concentrations of Ac-LEHD-AMC substrate. A series of six NCGC00183434 (**4**) dilutions (final 8 pM – 8 nM) in DMSO were prepared in duplicate in 384-well matrix plates, and 2  $\mu$ L of compound were transferred to 30  $\mu$ L caspase-1 in 384-well black assay plates with a CyBi-Well (CyBio Inc., Woburn, MA) 384-channel simultaneous pipettor. Following a 15 min coincubation of enzyme with NCGC00183434 (**4**), reactions were initiated with the CyBi-Well transfer of 10  $\mu$ L Ac-LEHD-AMC (final 0.5 – 50  $\mu$ M) dilutions in buffer from a 384-well source plate to the assay plate. The change in AMC fluorescence was measured over 20 min, and data were normalized to no-enzyme and DMSO controls. Global curve-fitting of data was performed with GraFit 5 software. A competitive inhibition model was fitted to the data which estimated a  $K_I=0.4$  nM and a  $K_M$  for the AMC substrate of 15  $\mu$ M

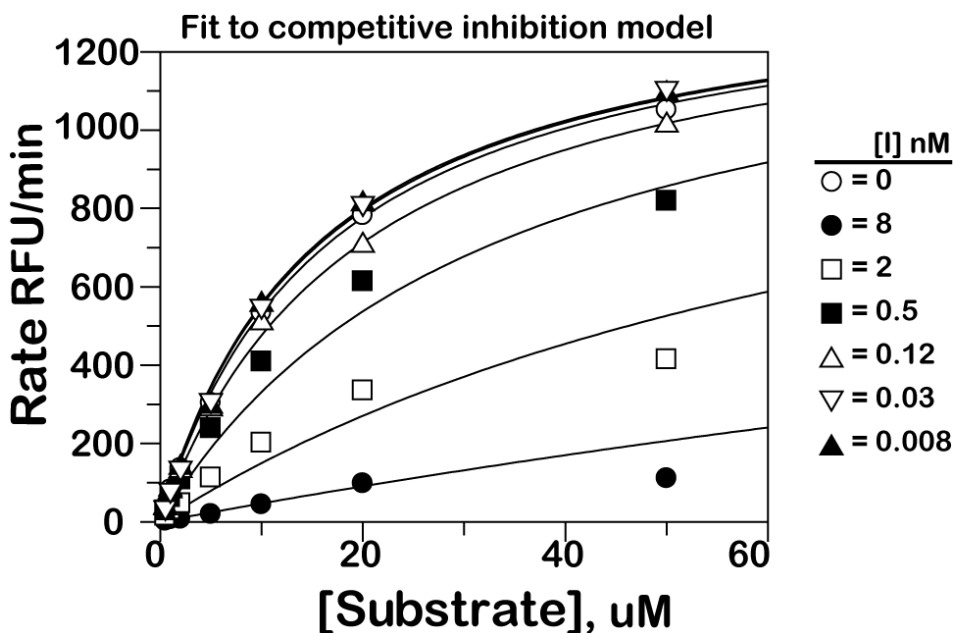

Supplement: NIHMS191921-supplement-Suppl_Info.pdf [file NIHMS191921-supplement-Suppl_Info.pdf]
